# Supplementary material for: Genetic Variation Related to High Elevation Adaptation Revealed by Common Garden Experiments in Pinus yunnanensis
Source: Front Genet. 2020 Feb 11;10:1405. doi: 10.3389/fgene.2019.01405 (PMC7027398; doi:10.3389/fgene.2019.01405)
Supplement: Supplementary file 6 [file Table_5.xlsx]

## Sheet: Table S5
Table S5. Annotation of 294 outlier SNPs between KM(LZ) and ALL(KM). Ref: reference allele; Alt: alternate allele; Effect: annotated using Sequence Ontology terms; HGVS_C: HGVS (http://www.hgvs.org/) annotation for variant in DNA level; HGVS_P: HGVS annotation for variant in protein level; Impact: a simple estimation of putative impact/deleteriousness (HIGH, MODERATE, LOW, MODIFIER); Overlap: ove…
Scaffold	Positon	Ref	Alt	Effect	Pinus taeda gene id	HGVS_C	HGVS_P	Impact	Overlap	Arabidopsis gene id	TF family	Tair function description
C31192214	1465	C	A	intergenic_region	NONE	NONE	NONE	MODIFIER	no	NONE	NONE	NONE
C32121094	10592	C	T	synonymous_variant	PITA_000088265-RA	c.889C>T	p.Leu297Leu	LOW	yes	AT4G36470	NONE	S-adenosyl-L-methionine-dependent methyltransferases superfamily protein;(source:Araport11)
C32228092	14440	G	A	intergenic_region	NONE	NONE	NONE	MODIFIER	no	NONE	NONE	NONE
C32228092	14496	A	G	intergenic_region	NONE	NONE	NONE	MODIFIER	no	NONE	NONE	NONE
C32228092	14720	C	T	intergenic_region	NONE	NONE	NONE	MODIFIER	no	NONE	NONE	NONE
C32228092	15241	C	T	intergenic_region	NONE	NONE	NONE	MODIFIER	no	NONE	NONE	NONE
C32248740	5718	C	T	missense_variant	PITA_000082901-RA	c.853G>A	p.Gly285Arg	MODERATE	no	AT5G50350	NONE	hypothetical protein;(source:Araport11)
C32295000	21418	T	C	missense_variant	PITA_000080552-RA	c.43A>G	p.Ser15Gly	MODERATE	no	AT5G66100	NONE	Encodes a LAM domain containing protein that is involved in leaf senescence.
C32295518	31027	C	T	missense_variant	PITA_000080510-RA	c.283G>A	p.Ala95Thr	MODERATE	no	AT5G27320	NONE	Encodes a gibberellin (GA) receptor ortholog of the rice GA receptor gene (OsGID1). Has GA-binding activity, showing higher affinity to GA4. Interacts with DELLA proteins in vivo in the presence of GA4.
C32295518	31165	G	A	synonymous_variant	PITA_000080510-RA	c.145C>T	p.Leu49Leu	LOW	no	AT5G27320	NONE	Encodes a gibberellin (GA) receptor ortholog of the rice GA receptor gene (OsGID1). Has GA-binding activity, showing higher affinity to GA4. Interacts with DELLA proteins in vivo in the presence of GA4.
C32370550	6514	G	A	missense_variant	PITA_000076577-RA	c.1549C>T	p.Leu517Phe	MODERATE	no	AT1G55020	NONE	lipoxygenase, a defense gene conferring resistance Xanthomonas campestris The mRNA is cell-to-cell mobile.
C32508606	33662	C	A	missense_variant	PITA_000060397-RA	c.246C>A	p.Phe82Leu	MODERATE	no	AT3G06460	NONE	ELO family protein containing a characteristic histidine motif which binds to AtCb5-B, interacts with AtBI-1
C32560536	15945	A	C	synonymous_variant	PITA_000038490-RA	c.516A>C	p.Gly172Gly	LOW	no	AT1G70730	NONE	Encodes a cytosolic phosphoglucomutase (PGM). Two Arabidopsis PGM proteins (AT1G70730/PGM2 and AT1G23190/PGM3) have high sequence similarities and redundant functions. Mature plants possessing a single cPGM allele had a major reduction in cPGM activity. Whereas pgm2 and pgm3 single mutants are undistinguishable from the wild type, loss of both PGM2 and PGM3 severely impairs male and female gameto…
C32565270	146920	G	A	synonymous_variant	PITA_000032619-RA	c.630C>T	p.Ala210Ala	LOW	yes	AT5G07990	NONE	Required for flavonoid 3' hydroxylase activity. Enzyme abundance relative to CHS determines Quercetin/Kaempferol metabolite ratio. The mRNA is cell-to-cell mobile.
C32565270	146923	C	T	synonymous_variant	PITA_000032619-RA	c.627G>A	p.Lys209Lys	LOW	yes	AT5G07990	NONE	Required for flavonoid 4' hydroxylase activity. Enzyme abundance relative to CHS determines Quercetin/Kaempferol metabolite ratio. The mRNA is cell-to-cell mobile.
C32565270	146932	C	T	synonymous_variant	PITA_000032619-RA	c.618G>A	p.Gln206Gln	LOW	yes	AT5G07990	NONE	Required for flavonoid 5' hydroxylase activity. Enzyme abundance relative to CHS determines Quercetin/Kaempferol metabolite ratio. The mRNA is cell-to-cell mobile.
C32565270	146998	C	T	synonymous_variant	PITA_000032619-RA	c.552G>A	p.Leu184Leu	LOW	yes	AT5G07990	NONE	Required for flavonoid 6' hydroxylase activity. Enzyme abundance relative to CHS determines Quercetin/Kaempferol metabolite ratio. The mRNA is cell-to-cell mobile.
C32565270	147108	C	T	missense_variant	PITA_000032619-RA	c.442G>A	p.Gly148Ser	MODERATE	yes	AT5G07990	NONE	Required for flavonoid 7' hydroxylase activity. Enzyme abundance relative to CHS determines Quercetin/Kaempferol metabolite ratio. The mRNA is cell-to-cell mobile.
C32565270	147466	G	A	synonymous_variant	PITA_000032619-RA	c.84C>T	p.Leu28Leu	LOW	yes	AT5G07990	NONE	Required for flavonoid 8' hydroxylase activity. Enzyme abundance relative to CHS determines Quercetin/Kaempferol metabolite ratio. The mRNA is cell-to-cell mobile.
C32566744	38451	C	T	intergenic_region	NONE	n.38451C>T	NONE	MODIFIER	no	NONE	NONE	NONE
C32567730	53626	T	C	synonymous_variant	PITA_000028629-RA	c.88T>C	p.Leu30Leu	LOW	no	AT4G17010	NONE	transcription factor IIIB;(source:Araport11)
C32567730	53860	A	T	missense_variant	PITA_000028629-RA	c.220A>T	p.Thr74Ser	MODERATE	no	AT4G17010	NONE	transcription factor IIIB;(source:Araport12)
C32571248	326502	T	C	intergenic_region	NONE	n.326502T>C	NONE	MODIFIER	yes	NONE	NONE	NONE
scaffold107961	54127	A	C	missense_variant	PITA_000047981-RA	c.442A>C	p.Met148Leu	MODERATE	no	AT3G62550	NONE	Adenine nucleotide alpha hydrolases-like superfamily protein;(source:Araport11)
scaffold13784	40344	G	A	downstream_gene_variant	PITA_000045699-RA	c.*29G>A	NONE	MODIFIER	no	AT1G75560	NONE	zinc knuckle (CCHC-type) family protein;(source:Araport11)
scaffold138136.3	61606	T	A	missense_variant	PITA_000056229-RA	c.1298A>T	p.His433Leu	MODERATE	no	AT5G10270	NONE	Encodes CDKC;1, part of a CDKC kinase complex that is targeted by Cauliflower mosaic virus (CaMV) for transcriptional activation of viral genes. Also regulates plant growth and development.
scaffold151070	48919	T	C	downstream_gene_variant	PITA_000064678-RA	c.*203T>C	NONE	MODIFIER	no	AT2G03420	NONE	hypothetical protein;(source:Araport11)
scaffold157210.1	5211	T	C	intergenic_region	NONE	NONE	NONE	MODIFIER	no	NONE	NONE	NONE
scaffold159460.1	113426	A	G	synonymous_variant	PITA_000041284-RA	c.927A>G	p.Gly309Gly	LOW	yes	AT5G12400	NONE	PHD-finger and DNA binding domain-containing protein;(source:Araport11)
scaffold180977.1	10879	C	T	3_prime_UTR_variant	PITA_000051044-RA	c.*104C>T	NONE	MODIFIER	no	AT1G06070	bZIP	Basic-leucine zipper (bZIP) transcription factor family protein;(source:Araport11)
scaffold208535	48598	C	A	downstream_gene_variant	PITA_000043242-RA	c.*229C>A	NONE	MODIFIER	no	AT1G47420	NONE	predicted to encode subunit 5 of mitochondrial complex II and to participate in the respiratory chain
scaffold227458	11184	T	C	synonymous_variant	PITA_000075240-RA	c.354T>C	p.Asn118Asn	LOW	no	AT1G30520	NONE	Encodes a chloroplast O-succinylbenzoyl-CoA ligase. Involved in phylloquinone biosynthesis. Knock mutant is seedling lethal.
scaffold227458	15214	T	C	missense_variant	PITA_000075240-RA	c.1001T>C	p.Val334Ala	MODERATE	no	AT1G30520	NONE	Encodes a chloroplast O-succinylbenzoyl-CoA ligase. Involved in phylloquinone biosynthesis. Knock mutant is seedling lethal.
scaffold23075.1	42804	G	C	upstream_gene_variant	PITA_000074647-RA	c.NONE5G>C	NONE	MODIFIER	no	AT5G15410	NONE	'defense, no death' gene (DND1) encodes a mutated cyclic nucleotide-gated cation channel; Same as CNGC2 (article ID 229): Cyclic nucleotide gated channel, activated by cAMP, conducts K+ and other monovalent cations but excludes Na+, does not contain the GYG amino acid sequence found in other channels with this conductivity profile. Conducts Ca2+ into cells which is linked to the generation of NO …
scaffold23075.1	44731	G	A	missense_variant	PITA_000074647-RA	c.961G>A	p.Gly321Ser	MODERATE	no	AT5G15410	NONE	'defense, no death' gene (DND1) encodes a mutated cyclic nucleotide-gated cation channel; Same as CNGC2 (article ID 229): Cyclic nucleotide gated channel, activated by cAMP, conducts K+ and other monovalent cations but excludes Na+, does not contain the GYG amino acid sequence found in other channels with this conductivity profile. Conducts Ca2+ into cells which is linked to the generation of NO …
scaffold243249	35345	T	C	synonymous_variant	PITA_000038683-RA	c.210A>G	p.Glu70Glu	LOW	no	AT1G22450	NONE	subunit 6b of cytochrome c oxidase
scaffold243249	35419	T	C	missense_variant	PITA_000038683-RA	c.136A>G	p.Lys46Glu	MODERATE	no	AT1G22450	NONE	subunit 7b of cytochrome c oxidase
scaffold243249	35452	T	C	missense_variant	PITA_000038683-RA	c.103A>G	p.Ile35Val	MODERATE	no	AT1G22450	NONE	subunit 8b of cytochrome c oxidase
scaffold250259	35002	C	T	missense_variant	PITA_000025939-RA	c.91G>A	p.Glu31Lys	MODERATE	no	AT4G36480	NONE	Encodes the LCB1 subunit of serine palmitoyltransferase. Together with the LCB2 subunit, forms a functional serine palmitoyltransferase complex, which catalyzes the first reaction of sphingolipid biosynthesis. Knockout of LCB1 was embryo lethal. Partial suppression of LCB1 expression led to smaller plants due to reduced cell expansion.
scaffold251061	5573	G	A	synonymous_variant	PITA_000068406-RA	c.795G>A	p.Ala265Ala	LOW	no	AT3G02520	NONE	Encodes GF14 ν, a 14-3-3 protein isoform (14-3-3ν).
scaffold265731	53968	T	A	missense_variant	PITA_000041326-RA	c.871A>T	p.Thr291Ser	MODERATE	yes	AT1G77000	NONE	AtSKP2;2 is a homolog of human SKP2, the human F-box protein that recruits E2F1. Contains an F-box motif at the N-terminal region and a C-terminal Leu-rich repeat domain. Forms part of an E3-ubiquitin-ligase SCF (Skp1, cullin, F-box) complex and recruits phosphorylated AtE2Fc, a transcriptional factor that might play a role in cell division and during the transition from skotomorphogenesis to pho…
scaffold265731	54352	A	G	missense_variant	PITA_000041326-RA	c.580T>C	p.Cys194Arg	MODERATE	yes	AT1G77000	NONE	AtSKP2;2 is a homolog of human SKP2, the human F-box protein that recruits E2F1. Contains an F-box motif at the N-terminal region and a C-terminal Leu-rich repeat domain. Forms part of an E3-ubiquitin-ligase SCF (Skp1, cullin, F-box) complex and recruits phosphorylated AtE2Fc, a transcriptional factor that might play a role in cell division and during the transition from skotomorphogenesis to pho…
scaffold265731	55999	A	C	synonymous_variant	PITA_000041326-RA	c.465T>G	p.Thr155Thr	LOW	yes	AT1G77000	NONE	AtSKP2;2 is a homolog of human SKP2, the human F-box protein that recruits E2F1. Contains an F-box motif at the N-terminal region and a C-terminal Leu-rich repeat domain. Forms part of an E3-ubiquitin-ligase SCF (Skp1, cullin, F-box) complex and recruits phosphorylated AtE2Fc, a transcriptional factor that might play a role in cell division and during the transition from skotomorphogenesis to pho…
scaffold281615	104018	C	T	missense_variant	PITAhm_002273-RA	c.496C>T	p.Arg166Cys	MODERATE	no	NONE	NONE	NONE
scaffold295699	25318	T	G	missense_variant	PITA_000042229-RA	c.467T>G	p.Leu156Arg	MODERATE	no	AT1G54350	NONE	ABC transporter family protein;(source:Araport11)
scaffold342485	38232	T	C	intergenic_region	NONE	NONE	NONE	MODIFIER	no	NONE	NONE	NONE
scaffold369458	4208	G	C	synonymous_variant	PITA_000044882-RA	c.522G>C	p.Leu174Leu	LOW	no	AT5G24020	NONE	Encodes a Ca2+ dependent ATPase required for correct positioning of the chloroplast division apparatus. Its ATPase activity is stimulated by AtMinE1, a topological specificity factor.
scaffold369458	4646	G	A	synonymous_variant	PITA_000044882-RA	c.960G>A	p.Val320Val	LOW	no	AT5G24020	NONE	Encodes a Ca2+ dependent ATPase required for correct positioning of the chloroplast division apparatus. Its ATPase activity is stimulated by AtMinE2, a topological specificity factor.
scaffold390487	130936	A	G	missense_variant	PITA_000033164-RA	c.1568A>G	p.Glu523Gly	MODERATE	no	NONE	NONE	NONE
scaffold392145	71458	G	C	5_prime_UTR_variant	PITA_000030522-RA	c.NONE24G>C	NONE	MODIFIER	no	AT4G34730	NONE	ribosome-binding factor A family protein;(source:Araport11)
scaffold392145	71581	C	T	5_prime_UTR_variant	PITA_000030522-RA	c.NONEC>T	NONE	MODIFIER	no	AT4G34730	NONE	ribosome-binding factor A family protein;(source:Araport12)
scaffold392145	106093	A	G	missense_variant	PITA_000030522-RA	c.565A>G	p.Asn189Asp	MODERATE	no	AT4G34730	NONE	ribosome-binding factor A family protein;(source:Araport13)
scaffold392145	168459	A	G	intergenic_region	NONE	n.168459A>G	NONE	MODIFIER	no	NONE	NONE	NONE
scaffold392145	168728	T	C	intergenic_region	NONE	n.168728T>C	NONE	MODIFIER	no	NONE	NONE	NONE
scaffold428274.2	37196	A	G	missense_variant	PITA_000044887-RA	c.121A>G	p.Thr41Ala	MODERATE	yes	AT4G28706	NONE	pfkB-like carbohydrate kinase family protein;(source:Araport11)
scaffold439451	6733	G	A	upstream_gene_variant	PITA_000091299-RA	c.-31C>T	NONE	MODIFIER	yes	AT5G07990	NONE	Required for flavonoid 3' hydroxylase activity. Enzyme abundance relative to CHS determines Quercetin/Kaempferol metabolite ratio. The mRNA is cell-to-cell mobile.
scaffold477181	211420	G	A	missense_variant	PITA_000028012-RA	c.199C>T	p.Pro67Ser	MODERATE	yes	AT1G08420	NONE	BRI1 suppressor 1 (BSU1)-like 2;(source:Araport11)
scaffold486264.1	61523	T	C	intergenic_region	NONE	NONE	NONE	MODIFIER	no	NONE	NONE	NONE
scaffold5184.1	44239	G	A	synonymous_variant	PITA_000046315-RA	c.759G>A	p.Val253Val	LOW	yes	AT1G29690	NONE	Encodes a protein containing a domain with significant homology to the MACPF (membrane attack complex and perforin) domain of complements and perforin proteins that are involved in innate immunity in animals. Transgenic cad1-1 mutant plants show lesions seen in the hypersensitive response, as well as a spontaneous activation of expression of pathogenesis-related genes and leading to a 32-fold inc…
scaffold52681	14904	A	G	intergenic_region	NONE	NONE	NONE	MODIFIER	no	NONE	NONE	NONE
scaffold563850.1	79859	A	G	missense_variant	PITA_000050444-RA	c.370A>G	p.Lys124Glu	MODERATE	no	AT1G77250	NONE	RING/FYVE/PHD-type zinc finger family protein;(source:Araport11)
scaffold606809.1	73754	G	A	synonymous_variant	PITA_000042917-RA	c.570C>T	p.Gly190Gly	LOW	yes	AT3G04790	NONE	Ribose 5-phosphate isomerase, type A protein;(source:Araport11)
scaffold628721.2	5675	G	C	missense_variant	PITA_000093932-RA	c.290C>G	p.Thr97Ser	MODERATE	yes	AT3G51510	NONE	transmembrane protein;(source:Araport12)
scaffold628721.2	5844	G	T	missense_variant	PITA_000093932-RA	c.121C>A	p.His41Asn	MODERATE	yes	AT3G51510	NONE	transmembrane protein;(source:Araport12)
scaffold652130	23813	G	A	missense_variant	PITA_000068850-RA	c.2402G>A	p.Arg801Lys	MODERATE	yes	AT2G26650	NONE	Encodes AKT1, a member of the Shaker family inward rectifying potassium channel predominantly expressed in predominantly in root hairs and root endodermis. This family includes five groups based on phylogenetic analysis (FEBS Letters (2007) 581: 2357): I (inward rectifying channel): AKT1 (AT2G26650), AKT5 (AT4G32500) and SPIK (also known as AKT6, AT2G25600); II (inward rectifying channel): KAT1 (…
scaffold654494	18799	A	G	missense_variant	PITA_000087509-RA	c.2426T>C	p.Val809Ala	MODERATE	no	AT5G54830	NONE	DOMON domain-containing protein / dopamine beta-monooxygenase N-terminal domain-containing protein;(source:Araport11)
scaffold718562	27840	G	A	3_prime_UTR_variant	PITA_000057882-RA	c.*5C>T	NONE	MODIFIER	yes	AT2G37520	NONE	Acyl-CoA N-acyltransferase with RING/FYVE/PHD-type zinc finger domain-containing protein;(source:Araport11)
scaffold718692.3	52799	G	C	downstream_gene_variant	PITA_000057844-RA	c.*2G>C	NONE	MODIFIER	no	AT4G28290	NONE	hypothetical protein;(source:Araport11)
scaffold719144.1	80962	A	C	intergenic_region	NONE	NONE	NONE	MODIFIER	no	NONE	NONE	NONE
scaffold726335	204897	C	T	missense_variant	PITA_000022886-RA	c.850G>A	p.Ala284Thr	MODERATE	no	AT2G03810	NONE	18S pre-ribosomal assembly protein gar2-like protein;(source:Araport11)
scaffold737509	35932	A	G	3_prime_UTR_variant	PITA_000071447-RA	c.*2T>C	NONE	MODIFIER	no	AT5G54160	NONE	A caffeic acid/5-hydroxyferulic acid O-methyltransferase. Interacts with 14-4-3 proteins in yeast 2 hybrid assay. AtOMT1 (At5g54160) encodes a flavonol 3?-O-methyltransferase that is highly active towards quercetin and myricetin. The substrate specificity identifies the enzyme as flavonol 3?-methyltransferase which replaces the former annotation of the gene to encode a caffeic acid/5-hydroxyferul…
scaffold737509	35964	A	G	synonymous_variant	PITA_000071447-RA	c.1065T>C	p.Asn355Asn	LOW	no	AT5G54160	NONE	A caffeic acid/5-hydroxyferulic acid O-methyltransferase. Interacts with 14-4-3 proteins in yeast 2 hybrid assay. AtOMT1 (At5g54160) encodes a flavonol 3?-O-methyltransferase that is highly active towards quercetin and myricetin. The substrate specificity identifies the enzyme as flavonol 3?-methyltransferase which replaces the former annotation of the gene to encode a caffeic acid/5-hydroxyferul…
scaffold739686	23728	G	A	missense_variant	PITA_000080057-RA	c.1958G>A	p.Ser653Asn	MODERATE	no	AT1G48300	NONE	Cytosolic iron-sulfur protein with a [2Fe-2S] cluster which synthesizes triacylglycerol (DGAT activity).
scaffold749383	8892	C	G	downstream_gene_variant	PITA_000092661-RA	c.*6G>C	NONE	MODIFIER	yes	AT1G67090	NONE	Encodes a member of the Rubisco small subunit (RBCS) multigene family: RBCS1A (At1g67090), RBCS1B (At5g38430), RBCS2B (At5g38420), and RBCS3B (At5g38410). Functions to yield sufficient Rubisco content for leaf photosynthetic capacity.
scaffold757469.2	88569	T	A	5_prime_UTR_variant	PITA_000030659-RA	c.NONE88T>A	NONE	MODIFIER	no	AT5G53330	NONE	Ubiquitin-associated/translation elongation factor EF1B protein;(source:Araport11)
scaffold757469.2	88581	G	C	5_prime_UTR_variant	PITA_000030659-RA	c.NONE76G>C	NONE	MODIFIER	no	AT5G53330	NONE	Ubiquitin-associated/translation elongation factor EF1B protein;(source:Araport12)
scaffold757469.2	88719	T	C	5_prime_UTR_variant	PITA_000030659-RA	c.-38T>C	NONE	MODIFIER	no	AT5G53330	NONE	Ubiquitin-associated/translation elongation factor EF1B protein;(source:Araport13)
scaffold768750	28905	C	T	upstream_gene_variant	PITA_000039107-RA	c.-235C>T	NONE	MODIFIER	no	AT5G17600	NONE	RING/U-box superfamily protein;(source:Araport11)
scaffold768750	29044	C	A	upstream_gene_variant	PITA_000039107-RA	c.-96C>A	NONE	MODIFIER	yes	AT5G17600	NONE	RING/U-box superfamily protein;(source:Araport11)
scaffold768750	29066	A	G	upstream_gene_variant	PITA_000039107-RA	c.-74A>G	NONE	MODIFIER	yes	AT5G17600	NONE	RING/U-box superfamily protein;(source:Araport11)
scaffold768750	29481	G	A	synonymous_variant	PITA_000039107-RA	c.291G>A	p.Leu97Leu	LOW	no	AT5G17600	NONE	RING/U-box superfamily protein;(source:Araport11)
scaffold768750	29745	C	T	synonymous_variant	PITA_000039107-RA	c.555C>T	p.Ile185Ile	LOW	yes	AT5G17600	NONE	RING/U-box superfamily protein;(source:Araport11)
scaffold768750	30243	G	C	synonymous_variant	PITA_000039107-RA	c.1053G>C	p.Ser351Ser	LOW	yes	AT5G17600	NONE	RING/U-box superfamily protein;(source:Araport11)
scaffold770430	23741	T	C	synonymous_variant	PITA_000060208-RA	c.264A>G	p.Ser88Ser	LOW	yes	AT3G57880	NONE	Required for maintenance of inflorescence and shoot SAMs and normal development of the derived vascular cambium, functions in the SAM to promote continuous organogenesis, affects SAM development through STM, where it affects intracellular localization of STM in SAM cells in the peripheral region and prevents STM localization toward the cell wall of SAM cells in the peripheral region.
scaffold783303	5020	A	G	intergenic_region	NONE	NONE	NONE	MODIFIER	no	NONE	NONE	NONE
scaffold806506	6930	C	T	missense_variant	PITA_000048451-RA	c.211C>T	p.Arg71Cys	MODERATE	no	AT1G33520	NONE	Has single homolog in Arabidopsis, also homologs in human, mouse and C. elegans; contains one G-patch domain (known to mediate RNA-protein interactions) and two KOW domains (may bind RNA and/or protein); localized to the nucleus; mutant suppresses high SA levels and constitutive disease resistance in snc1 npr1 background; required for basal resistance against Pseudomonas syringae maculicola ES432…
scaffold806506	6976	T	A	missense_variant	PITA_000048451-RA	c.257T>A	p.Val86Glu	MODERATE	no	AT1G33520	NONE	Has single homolog in Arabidopsis, also homologs in human, mouse and C. elegans; contains one G-patch domain (known to mediate RNA-protein interactions) and two KOW domains (may bind RNA and/or protein); localized to the nucleus; mutant suppresses high SA levels and constitutive disease resistance in snc1 npr1 background; required for basal resistance against Pseudomonas syringae maculicola ES432…
scaffold806506	7045	A	G	missense_variant	PITA_000048451-RA	c.326A>G	p.Lys109Arg	MODERATE	no	AT1G33520	NONE	Has single homolog in Arabidopsis, also homologs in human, mouse and C. elegans; contains one G-patch domain (known to mediate RNA-protein interactions) and two KOW domains (may bind RNA and/or protein); localized to the nucleus; mutant suppresses high SA levels and constitutive disease resistance in snc1 npr1 background; required for basal resistance against Pseudomonas syringae maculicola ES432…
scaffold806506	7263	T	G	downstream_gene_variant	PITA_000048451-RA	c.*10T>G	NONE	MODIFIER	no	AT1G33520	NONE	Has single homolog in Arabidopsis, also homologs in human, mouse and C. elegans; contains one G-patch domain (known to mediate RNA-protein interactions) and two KOW domains (may bind RNA and/or protein); localized to the nucleus; mutant suppresses high SA levels and constitutive disease resistance in snc1 npr1 background; required for basal resistance against Pseudomonas syringae maculicola ES432…
scaffold8384.2	17993	T	C	missense_variant	PITA_000075464-RA	c.2066T>C	p.Val689Ala	MODERATE	no	AT4G25160	NONE	Encodes a U-box domain-containing E3 ubiquitin ligase with central Ser/Thr protein kinase domain whose expression is responsive to both phosphate (Pi) and phosphite (Phi) in both roots and shoots.
scaffold8384.2	18140	C	G	missense_variant	PITA_000075464-RA	c.2213C>G	p.Ala738Gly	MODERATE	no	AT4G25160	NONE	Encodes a U-box domain-containing E4 ubiquitin ligase with central Ser/Thr protein kinase domain whose expression is responsive to both phosphate (Pi) and phosphite (Phi) in both roots and shoots.
scaffold864978	11492	C	T	synonymous_variant	PITA_000079472-RA	c.240G>A	p.Glu80Glu	LOW	no	AT1G32360	C3H	Zinc finger (CCCH-type) family protein;(source:Araport11)
scaffold868040	22175	C	T	synonymous_variant	PITA_000076933-RA	c.54C>T	p.Asn18Asn	LOW	no	AT1G48300	NONE	Cytosolic iron-sulfur protein with a [2Fe-2S] cluster which synthesizes triacylglycerol (DGAT activity).
scaffold877824	16601	C	T	missense_variant	PITA_000089483-RA	c.1022G>A	p.Arg341Gln	MODERATE	no	AT1G31690	NONE	Copper amine oxidase family protein;(source:Araport11)
scaffold879963	24765	T	C	missense_variant	PITA_000081128-RA	c.191A>G	p.Glu64Gly	MODERATE	no	AT1G13360	NONE	hypothetical protein;(source:Araport11)
scaffold883591	61402	T	C	intergenic_region	NONE	n.61402T>C	NONE	MODIFIER	no	NONE	NONE	NONE
scaffold883591	61405	G	A	intergenic_region	NONE	n.61405G>A	NONE	MODIFIER	no	NONE	NONE	NONE
scaffold891339	39264	T	A	intergenic_region	NONE	NONE	NONE	MODIFIER	no	NONE	NONE	NONE
scaffold897478.1	3732	G	A	intergenic_region	NONE	NONE	NONE	MODIFIER	yes	NONE	NONE	NONE
scaffold897478.1	3765	A	G	intergenic_region	NONE	NONE	NONE	MODIFIER	yes	NONE	NONE	NONE
scaffold897478.1	4361	G	A	intergenic_region	NONE	NONE	NONE	MODIFIER	yes	NONE	NONE	NONE
scaffold897478.1	4373	G	T	intergenic_region	NONE	NONE	NONE	MODIFIER	yes	NONE	NONE	NONE
scaffold897478.1	4534	G	A	intergenic_region	NONE	NONE	NONE	MODIFIER	yes	NONE	NONE	NONE
scaffold897478.1	4559	T	C	intergenic_region	NONE	NONE	NONE	MODIFIER	yes	NONE	NONE	NONE
scaffold897555.2	53834	C	T	missense_variant	PITA_000065699-RA	c.202G>A	p.Val68Ile	MODERATE	yes	AT1G54380	NONE	Encodes GEMIN2, a spliceosomal small nuclear ribonucleoprotein assembly factor conserved from yeast to humans. GEMIN2 is a key component of a posttranscriptional regulatory mechanism that ensures the appropriate acclimation of plants to daily and seasonal changes in temperature conditions. It controls the alternative splicing of several circadian clock genes and attenuates the effects of temperat…
scaffold897733.2	13864	C	T	synonymous_variant	PITA_000068898-RA	c.63C>T	p.His21His	LOW	yes	AT1G49850	NONE	RING/U-box superfamily protein;(source:Araport14)
scaffold897733.2	13898	G	C	missense_variant	PITA_000068898-RA	c.97G>C	p.Asp33His	MODERATE	yes	AT1G49850	NONE	RING/U-box superfamily protein;(source:Araport15)
scaffold897733.2	17403	G	T	missense_variant	PITA_000068898-RA	c.982G>T	p.Ala328Ser	MODERATE	yes	AT1G49850	NONE	RING/U-box superfamily protein;(source:Araport16)
scaffold901522.1	37461	G	T	intergenic_region	NONE	NONE	NONE	MODIFIER	no	NONE	NONE	NONE
tscaffold1025	184618	G	A	synonymous_variant	PITA_000019562-RA	c.5535G>A	p.Gln1845Gln	LOW	no	AT3G24870	NONE	Helicase/SANT-associated, DNA binding protein;(source:Araport11)
tscaffold106	62193	T	G	missense_variant	PITA_000014871-RA	c.41A>C	p.Glu14Ala	MODERATE	no	AT1G47670	NONE	Transmembrane amino acid transporter family protein;(source:Araport11)
tscaffold1156	205236	G	A	downstream_gene_variant	PITAhm_000126-RA	c.*215618G>A	NONE	MODIFIER	no	AT3G11980	NONE	Similar to fatty acid reductases.
tscaffold1204	134491	G	A	5_prime_UTR_variant	PITA_000015562-RA	c.-92G>A	NONE	MODIFIER	no	AT5G26830	NONE	Encodes a dual-targeted threonyl-tRNA synthetase found in both the chloroplast and mitochondrion. The mRNA is cell-to-cell mobile.
tscaffold1243	464671	A	C	intron_variant	PITAhm_000683-RA	c.1104+624A>C	NONE	MODIFIER	no	AT1G77120	NONE	Catalyzes the reduction of acetaldehyde using NADH as reductant. Requires zinc for activity. Dimer. Anaerobic response polypeptide (ANP). Fermentation. The protein undergoes thiolation following treatment with the oxidant tert-butylhydroperoxide. The mRNA is cell-to-cell mobile.
tscaffold1288	227808	G	A	missense_variant	PITAhm_000923-RA	c.1293G>A	p.Met431Ile	MODERATE	no	AT3G48470	NONE	embryo defective 2423;(source:Araport11)
tscaffold1293	131614	T	C	intergenic_region	NONE	n.131614T>C	NONE	MODIFIER	no	NONE	NONE	NONE
tscaffold1328	55641	G	A	synonymous_variant	PITA_000027132-RA	c.4098G>A	p.Gln1366Gln	LOW	no	AT4G23220	NONE	Encodes a cysteine-rich receptor-like protein kinase.
tscaffold1401	633	T	A	synonymous_variant	PITA_000007610-RA	c.432T>A	p.Ala144Ala	LOW	no	AT1G77760	NONE	Encodes the cytosolic minor isoform of nitrate reductase (NR). Involved in the first step of nitrate assimilation, it contributes about 15% of the nitrate reductase activity in shoots. Similar to molybdopterin oxidoreductases at the N-terminus, and to FAD/NAD-binding cytochrome reductases at the C-terminus. Cofactors: FAD, heme iron (cytochrome B-557), and molybdenum-pterin.
tscaffold1401	206025	A	G	missense_variant	PITA_000007611-RA	c.1123A>G	p.Asn375Asp	MODERATE	no	AT1G77760	NONE	Encodes the cytosolic minor isoform of nitrate reductase (NR). Involved in the first step of nitrate assimilation, it contributes about 15% of the nitrate reductase activity in shoots. Similar to molybdopterin oxidoreductases at the N-terminus, and to FAD/NAD-binding cytochrome reductases at the C-terminus. Cofactors: FAD, heme iron (cytochrome B-557), and molybdenum-pterin.
tscaffold1401	206672	C	T	synonymous_variant	PITA_000007611-RA	c.1770C>T	p.Tyr590Tyr	LOW	no	AT1G77760	NONE	Encodes the cytosolic minor isoform of nitrate reductase (NR). Involved in the first step of nitrate assimilation, it contributes about 15% of the nitrate reductase activity in shoots. Similar to molybdopterin oxidoreductases at the N-terminus, and to FAD/NAD-binding cytochrome reductases at the C-terminus. Cofactors: FAD, heme iron (cytochrome B-557), and molybdenum-pterin.
tscaffold1497	252994	G	A	intergenic_region	NONE	n.252994G>A	NONE	MODIFIER	no	NONE	NONE	NONE
tscaffold1542	17627	A	C	synonymous_variant	PITAhm_001825-RA	c.681A>C	p.Pro227Pro	LOW	no	AT1G77180	NONE	Encodes a putative transcriptional factor. Shows transcriptional activator activity in yeast. Involved in response to abscisic acid, salt and osmotic stress. SKIP lengthens period of the circadian clock by impairing the alternative splicing of PRR7 and PRR9. SKIP regulates the splicing of SEF pre-mRNA and suppresses flowering by activation of FLC.
tscaffold1813	193759	T	C	intergenic_region	NONE	NONE	NONE	MODIFIER	no	NONE	NONE	NONE
tscaffold1915	378838	C	T	intron_variant	PITAhm_001341-RA	c.57+18G>A	NONE	MODIFIER	no	AT5G28910	NONE	alpha-(1,6)-fucosyltransferase;(source:Araport11)
tscaffold1992	252579	A	G	upstream_gene_variant	PITA_000024180-RA	c.-660T>C	NONE	MODIFIER	no	AT1G62390	NONE	Encodes one of the 36 carboxylate clamp (CC)-tetratricopeptide repeat (TPR) proteins (Prasad 2010, Pubmed ID: 20856808) with potential to interact with Hsp90/Hsp70 as co-chaperones.
tscaffold209	559620	G	A	missense_variant	PITAhm_000686-RA	c.95G>A	p.Ser32Asn	MODERATE	yes	AT1G05910	NONE	Encodes an acetylated histone-binding protein BRAT1. BRAT1 forms a complex with BRP15 to prevent transcriptional silencing.
tscaffold209	559871	G	A	missense_variant	PITAhm_000686-RA	c.346G>A	p.Gly116Ser	MODERATE	yes	AT1G05910	NONE	Encodes an acetylated histone-binding protein BRAT1. BRAT1 forms a complex with BRP15 to prevent transcriptional silencing.
tscaffold209	559951	A	T	missense_variant	PITAhm_000686-RA	c.426A>T	p.Gln142His	MODERATE	yes	AT1G05910	NONE	Encodes an acetylated histone-binding protein BRAT1. BRAT1 forms a complex with BRP15 to prevent transcriptional silencing.
tscaffold209	559958	A	G	missense_variant	PITAhm_000686-RA	c.433A>G	p.Thr145Ala	MODERATE	yes	AT1G05910	NONE	Encodes an acetylated histone-binding protein BRAT1. BRAT1 forms a complex with BRP15 to prevent transcriptional silencing.
tscaffold209	560068	G	A	synonymous_variant	PITAhm_000686-RA	c.543G>A	p.Lys181Lys	LOW	yes	AT1G05910	NONE	Encodes an acetylated histone-binding protein BRAT1. BRAT1 forms a complex with BRP15 to prevent transcriptional silencing.
tscaffold209	560183	C	A	missense_variant	PITAhm_000686-RA	c.658C>A	p.Gln220Lys	MODERATE	yes	AT1G05910	NONE	Encodes an acetylated histone-binding protein BRAT1. BRAT1 forms a complex with BRP15 to prevent transcriptional silencing.
tscaffold209	560244	C	T	missense_variant	PITAhm_000686-RA	c.719C>T	p.Ser240Leu	MODERATE	yes	AT1G05910	NONE	Encodes an acetylated histone-binding protein BRAT1. BRAT1 forms a complex with BRP15 to prevent transcriptional silencing.
tscaffold209	561353	G	C	missense_variant	PITAhm_000686-RA	c.1153G>C	p.Ala385Pro	MODERATE	yes	AT1G05910	NONE	Encodes an acetylated histone-binding protein BRAT1. BRAT1 forms a complex with BRP15 to prevent transcriptional silencing.
tscaffold209	561367	G	A	synonymous_variant	PITAhm_000686-RA	c.1167G>A	p.Ala389Ala	LOW	yes	AT1G05910	NONE	Encodes an acetylated histone-binding protein BRAT1. BRAT1 forms a complex with BRP15 to prevent transcriptional silencing.
tscaffold209	590607	G	T	missense_variant	PITAhm_000686-RA	c.1348G>T	p.Ala450Ser	MODERATE	yes	AT1G05910	NONE	Encodes an acetylated histone-binding protein BRAT1. BRAT1 forms a complex with BRP15 to prevent transcriptional silencing.
tscaffold209	692534	C	G	missense_variant	PITAhm_000686-RA	c.1712C>G	p.Ser571Cys	MODERATE	yes	AT1G05910	NONE	Encodes an acetylated histone-binding protein BRAT1. BRAT1 forms a complex with BRP15 to prevent transcriptional silencing.
tscaffold209	692610	A	G	synonymous_variant	PITAhm_000686-RA	c.1788A>G	p.Arg596Arg	LOW	yes	AT1G05910	NONE	Encodes an acetylated histone-binding protein BRAT1. BRAT1 forms a complex with BRP15 to prevent transcriptional silencing.
tscaffold209	715767	T	C	synonymous_variant	PITAhm_000686-RA	c.1947T>C	p.Pro649Pro	LOW	yes	AT1G05910	NONE	Encodes an acetylated histone-binding protein BRAT1. BRAT1 forms a complex with BRP15 to prevent transcriptional silencing.
tscaffold209	715805	T	C	missense_variant	PITAhm_000686-RA	c.1985T>C	p.Val662Ala	MODERATE	yes	AT1G05910	NONE	Encodes an acetylated histone-binding protein BRAT1. BRAT1 forms a complex with BRP15 to prevent transcriptional silencing.
tscaffold209	851589	A	G	intron_variant	PITAhm_000686-RA	c.2604+57506A>G	NONE	MODIFIER	yes	AT1G05910	NONE	Encodes an acetylated histone-binding protein BRAT1. BRAT1 forms a complex with BRP15 to prevent transcriptional silencing.
tscaffold209	879481	T	C	intron_variant	PITAhm_000686-RA	c.2604+85398T>C	NONE	MODIFIER	yes	AT1G05910	NONE	Encodes an acetylated histone-binding protein BRAT1. BRAT1 forms a complex with BRP15 to prevent transcriptional silencing.
tscaffold209	879526	C	T	intron_variant	PITAhm_000686-RA	c.2604+85443C>T	NONE	MODIFIER	yes	AT1G05910	NONE	Encodes an acetylated histone-binding protein BRAT1. BRAT1 forms a complex with BRP15 to prevent transcriptional silencing.
tscaffold209	879529	C	T	intron_variant	PITAhm_000686-RA	c.2604+85446C>T	NONE	MODIFIER	yes	AT1G05910	NONE	Encodes an acetylated histone-binding protein BRAT1. BRAT1 forms a complex with BRP15 to prevent transcriptional silencing.
tscaffold2181	165640	C	T	intergenic_region	NONE	NONE	NONE	MODIFIER	no	NONE	NONE	NONE
tscaffold2327	270426	T	C	intron_variant	PITAhm_003045-RA	c.250+37A>G	NONE	MODIFIER	yes	AT4G25740	NONE	RNA binding Plectin/S10 domain-containing protein;(source:Araport13)
tscaffold2327	270428	T	C	intron_variant	PITAhm_003045-RA	c.250+35A>G	NONE	MODIFIER	yes	AT4G25740	NONE	RNA binding Plectin/S10 domain-containing protein;(source:Araport13)
tscaffold2327	270433	G	A	intron_variant	PITAhm_003045-RA	c.250+30C>T	NONE	MODIFIER	yes	AT4G25740	NONE	RNA binding Plectin/S10 domain-containing protein;(source:Araport13)
tscaffold2327	270549	G	A	missense_variant	PITAhm_003045-RA	c.164C>T	p.Ala55Val	MODERATE	yes	AT4G25740	NONE	RNA binding Plectin/S10 domain-containing protein;(source:Araport13)
tscaffold2327	308762	C	T	intergenic_region	NONE	n.308762C>T	NONE	MODIFIER	yes	NONE	NONE	NONE
tscaffold2327	409010	C	T	synonymous_variant	PITA_000008641-RA	c.180C>T	p.Leu60Leu	LOW	yes	AT5G36790	NONE	Haloacid dehalogenase-like hydrolase (HAD) superfamily protein;(source:Araport11)
tscaffold2394	118150	A	C	intergenic_region	NONE	n.118150A>C	NONE	MODIFIER	no	NONE	NONE	NONE
tscaffold2404	394269	A	G	intron_variant	PITA_000000039-RA	c.653+4926T>C	NONE	MODIFIER	no	AT2G23620	NONE	Encodes a protein shown to have carboxylesterase activity, methyl salicylate esterase activity, methyl jasmonate esterase activity, and methyl IAA esterase activity in vitro. MES1 appears to be involved in MeSA hydrolysis in planta. Expression of MES1 can restore systemic acquired resistance in SAR-deficient tobacco plants. This protein does not act on MeGA4, or MEGA9 in vitro.
tscaffold2404	394270	T	A	intron_variant	PITA_000000039-RA	c.653+4925A>T	NONE	MODIFIER	no	AT2G23620	NONE	Encodes a protein shown to have carboxylesterase activity, methyl salicylate esterase activity, methyl jasmonate esterase activity, and methyl IAA esterase activity in vitro. MES1 appears to be involved in MeSA hydrolysis in planta. Expression of MES1 can restore systemic acquired resistance in SAR-deficient tobacco plants. This protein does not act on MeGA4, or MEGA9 in vitro.
tscaffold2458	147350	C	T	intron_variant	PITAhm_000428-RA	c.864NONE97G>A	NONE	MODIFIER	no	AT4G22880	NONE	encodes leucoanthocyanidin dioxygenase, which is involved in proanthocyanin biosynthesis. Mutant analysis suggests that this gene is also involved in vacuole formation
tscaffold2470	308502	A	G	intergenic_region	NONE	NONE	NONE	MODIFIER	no	NONE	NONE	NONE
tscaffold2480	150485	G	A	intron_variant	PITAhm_000440-RA	c.209+1271G>A	NONE	MODIFIER	no	AT4G34050	NONE	S-adenosyl-L-methionine-dependent methyltransferases superfamily protein;(source:Araport11)
tscaffold2532	293914	C	G	intergenic_region	NONE	n.293914C>G	NONE	MODIFIER	no	NONE	NONE	NONE
tscaffold2723	321953	C	T	missense_variant	2A_I27_VO_L_1138_T_23/35|m.23384.mrna1	c.980C>T	p.Ala327Val	MODERATE	no	AT1G72880	NONE	Survival protein SurE-like phosphatase/nucleotidase;(source:Araport11)
tscaffold2728	1043496	T	C	intergenic_region	NONE	n.1043496T>C	NONE	MODIFIER	yes	NONE	NONE	NONE
tscaffold2807	89483	T	A	missense_variant	PITAhm_001072-RA	c.254T>A	p.Phe85Tyr	MODERATE	no	AT2G43940	NONE	S-adenosyl-L-methionine-dependent methyltransferases superfamily protein;(source:Araport11)
tscaffold2826	50665	G	A	intergenic_region	NONE	NONE	NONE	MODIFIER	no	NONE	NONE	NONE
tscaffold2826	83205	C	G	intergenic_region	NONE	NONE	NONE	MODIFIER	no	NONE	NONE	NONE
tscaffold2826	121061	T	C	intergenic_region	NONE	NONE	NONE	MODIFIER	no	NONE	NONE	NONE
tscaffold2826	121077	C	T	intergenic_region	NONE	NONE	NONE	MODIFIER	no	NONE	NONE	NONE
tscaffold2826	215017	C	T	intergenic_region	NONE	NONE	NONE	MODIFIER	no	NONE	NONE	NONE
tscaffold2865	207097	G	T	intergenic_region	NONE	n.207097G>T	NONE	MODIFIER	no	NONE	NONE	NONE
tscaffold2882	86273	G	A	intergenic_region	NONE	NONE	NONE	MODIFIER	no	NONE	NONE	NONE
tscaffold2923	504658	A	T	intergenic_region	NONE	n.504658A>T	NONE	MODIFIER	no	NONE	NONE	NONE
tscaffold2973	449453	C	T	intergenic_region	NONE	n.449453C>T	NONE	MODIFIER	no	NONE	NONE	NONE
tscaffold2992	91969	C	A	missense_variant	PITA_000014171-RA	c.61G>T	p.Ala21Ser	MODERATE	no	AT5G08450	NONE	Component of histone-deacetylase complexes. Interacts with HDA6 and HDA19 and facilitates histone deacetylation. Several salt-inducible genes are de-repressed in hdc1 mutants. Mutants are hypersensitive to ABA during germination, grow less and flower later than wildtype. HDC1-overexpressing plants display opposite phenotypes.
tscaffold3078	211701	G	A	intron_variant	PITAhm_000457-RA	c.303+224G>A	NONE	MODIFIER	no	AT2G33150	NONE	Encodes an organellar (peroxisome, glyoxysome) 3-ketoacyl-CoA thiolase, involved in fatty acid b-oxidation during germination and subsequent seedling growth. Mutants have defects in glyoxysomal fatty acid beta-oxidation. EC2.3.1.16 thiolase.
tscaffold3178	22796	T	G	missense_variant	PITA_000025907-RA	c.410T>G	p.Leu137Arg	MODERATE	no	AT2G45560	NONE	cytochrome P450 monooxygenase
tscaffold3279	610132	T	C	intergenic_region	NONE	n.610132T>C	NONE	MODIFIER	yes	NONE	NONE	NONE
tscaffold3385	369079	T	C	synonymous_variant	PITAhm_000111-RA	c.5022T>C	p.Pro1674Pro	LOW	yes	AT2G25660	NONE	Translocon at the inner-envelope membrane of chloroplasts which binds to the outer-membrane channel TOC75.
tscaffold3385	369448	C	G	synonymous_variant	PITAhm_000111-RA	c.5391C>G	p.Thr1797Thr	LOW	no	AT2G25660	NONE	Translocon at the inner-envelope membrane of chloroplasts which binds to the outer-membrane channel TOC75.
tscaffold3423	103119	A	G	missense_variant	PITA_000036728-RA	c.190T>C	p.Cys64Arg	MODERATE	no	AT5G26594	NONE	Encodes an atypical subtype of the ARR (Arabidopsis response regulator) protein family . It appears to be expressed in floral buds, mature flowers, and pollen. But, unlike the related ARR22 protein, it does not appear to be expressed at the seed:funiculus junction.
tscaffold3481	10450	C	T	intergenic_region	NONE	NONE	NONE	MODIFIER	yes	NONE	NONE	NONE
tscaffold3532	32434	T	C	upstream_gene_variant	PITA_000010175-RA	c.NONE650T>C	NONE	MODIFIER	no	AT1G06330	NONE	Heavy metal transport/detoxification superfamily protein;(source:Araport11)
tscaffold3581	175589	T	G	intergenic_region	NONE	NONE	NONE	MODIFIER	no	NONE	NONE	NONE
tscaffold36	218293	C	T	intergenic_region	NONE	NONE	NONE	MODIFIER	no	NONE	NONE	NONE
tscaffold3627	116524	A	G	intergenic_region	NONE	n.116524A>G	NONE	MODIFIER	no	NONE	NONE	NONE
tscaffold3644	299693	G	T	synonymous_variant	PITA_000016598-RA	c.876C>A	p.Ala292Ala	LOW	no	AT4G34340	NONE	TBP-associated factor 8;(source:Araport11)
tscaffold3708	21302	A	G	intergenic_region	NONE	NONE	NONE	MODIFIER	yes	NONE	NONE	NONE
tscaffold3796	46267	T	C	synonymous_variant	PITA_000008846-RA	c.252T>C	p.Val84Val	LOW	no	AT2G18450	NONE	Nuclear encoded mitochondrial flavoprotein subunit of succinate dehydrogenase complex .
tscaffold3798	127555	T	C	intergenic_region	NONE	n.127555T>C	NONE	MODIFIER	no	NONE	NONE	NONE
tscaffold3798	130964	A	C	missense_variant	6A_I25_VO_L_1847_T_32/46|m.61099.mrna2	c.517A>C	p.Ile173Leu	MODERATE	no	AT1G60680	NONE	NAD(P)-linked oxidoreductase superfamily protein;(source:Araport17)
tscaffold3798	279015	C	T	synonymous_variant	6A_I25_VO_L_1847_T_32/46|m.61099.mrna2	c.735C>T	p.Thr245Thr	LOW	no	AT1G60680	NONE	NAD(P)-linked oxidoreductase superfamily protein;(source:Araport17)
tscaffold3798	279033	G	A	synonymous_variant	6A_I25_VO_L_1847_T_32/46|m.61099.mrna2	c.753G>A	p.Leu251Leu	LOW	yes	AT1G60680	NONE	NAD(P)-linked oxidoreductase superfamily protein;(source:Araport17)
tscaffold3798	279230	A	T	synonymous_variant	6A_I25_VO_L_1847_T_32/46|m.61099.mrna2	c.855A>T	p.Ser285Ser	LOW	yes	AT1G60680	NONE	NAD(P)-linked oxidoreductase superfamily protein;(source:Araport17)
tscaffold3798	279405	A	C	downstream_gene_variant	6A_I25_VO_L_1847_T_32/46|m.61099.mrna2	c.*55A>C	NONE	MODIFIER	yes	AT1G60680	NONE	NAD(P)-linked oxidoreductase superfamily protein;(source:Araport17)
tscaffold381	44693	G	A	synonymous_variant	PITAhm_001706-RA	c.1233C>T	p.Asp411Asp	LOW	no	AT1G18390	NONE	Serine/Threonine kinase family catalytic domain protein;(source:Araport11)
tscaffold394	42291	C	A	missense_variant	PITAhm_003299-RA	c.619G>T	p.Val207Phe	MODERATE	no	AT3G30390	NONE	Encodes a putative amino acid transporter.
tscaffold394	42704	G	A	synonymous_variant	PITAhm_003299-RA	c.523C>T	p.Leu175Leu	LOW	no	AT3G30390	NONE	Encodes a putative amino acid transporter.
tscaffold394	42744	T	C	synonymous_variant	PITAhm_003299-RA	c.483A>G	p.Glu161Glu	LOW	no	AT3G30390	NONE	Encodes a putative amino acid transporter.
tscaffold394	42746	C	G	missense_variant	PITAhm_003299-RA	c.481G>C	p.Glu161Gln	MODERATE	no	AT3G30390	NONE	Encodes a putative amino acid transporter.
tscaffold394	42753	T	C	missense_variant	PITAhm_003299-RA	c.474A>G	p.Ile158Met	MODERATE	no	AT3G30390	NONE	Encodes a putative amino acid transporter.
tscaffold3994	600626	C	G	missense_variant	PITA_000002958-RA	c.453G>C	p.Lys151Asn	MODERATE	yes	AT5G18400	NONE	Cytokine-induced anti-apoptosis inhibitor 1, Fe-S biogenesi;(source:Araport11)
tscaffold4020	69250	G	T	intergenic_region	NONE	n.69250G>T	NONE	MODIFIER	no	NONE	NONE	NONE
tscaffold4021	181285	C	T	intron_variant	PITAhm_001176-RA	c.394NONE7595G>A	NONE	MODIFIER	no	AT2G01170	NONE	Encodes a bidirectional amino acid transporter that can transport ala, arg, glu and lys, GABA but not pro with both export and import activity. Its expression is localized in the vascular tissues suggesting a function in amino acids export from the phloem into sink tissue.
tscaffold4037	14913	A	G	intergenic_region	NONE	NONE	NONE	MODIFIER	no	NONE	NONE	NONE
tscaffold4089	127654	A	T	intergenic_region	NONE	n.127654A>T	NONE	MODIFIER	no	NONE	NONE	NONE
tscaffold4089	127702	A	G	intergenic_region	NONE	n.127702A>G	NONE	MODIFIER	yes	NONE	NONE	NONE
tscaffold424	123104	C	A	missense_variant	PITAhm_000293-RA	c.423C>A	p.Phe141Leu	MODERATE	no	AT5G65540	NONE	transcription initiation factor TFIID subunit;(source:Araport11)
tscaffold424	123132	G	A	missense_variant	PITAhm_000293-RA	c.451G>A	p.Val151Ile	MODERATE	no	AT5G65540	NONE	transcription initiation factor TFIID subunit;(source:Araport11)
tscaffold4342	165695	A	C	missense_variant	PITA_000034174-RA	c.415T>G	p.Leu139Val	MODERATE	no	AT4G37300	NONE	maternal effect embryo arrest 59;(source:Araport11)
tscaffold4347	98227	G	C	missense_variant	PITAhm_002424-RA	c.2416G>C	p.Glu806Gln	MODERATE	no	AT3G13290	NONE	varicose-like protein;(source:Araport11)
tscaffold4451	13144	G	A	intron_variant	PITA_000091107-RA	c.202NONE62G>A	NONE	MODIFIER	no	AT1G61300	NONE	LRR and NB-ARC domains-containing disease resistance protein;(source:Araport11)
tscaffold4517	4183	C	T	intergenic_region	NONE	NONE	NONE	MODIFIER	no	NONE	NONE	NONE
tscaffold4581	287458	A	G	intron_variant	PITAhm_001340-RA	c.481NONE752T>C	NONE	MODIFIER	yes	AT1G30360	NONE	Early-responsive to dehydration stress protein (ERD4);(source:Araport11)
tscaffold4729	1036759	C	T	intergenic_region	NONE	n.1036759C>T	NONE	MODIFIER	no	NONE	NONE	NONE
tscaffold4729	1037437	C	T	intergenic_region	NONE	n.1037437C>T	NONE	MODIFIER	no	NONE	NONE	NONE
tscaffold4729	1240445	C	A	intergenic_region	NONE	n.1240445C>A	NONE	MODIFIER	no	NONE	NONE	NONE
tscaffold4729	1240638	C	T	intergenic_region	NONE	n.1240638C>T	NONE	MODIFIER	no	NONE	NONE	NONE
tscaffold481	553831	C	A	synonymous_variant	PITAhm_000033-RA	c.1080G>T	p.Pro360Pro	LOW	no	AT5G13550	NONE	Encodes a sulfate transporter.
tscaffold4847	13916	C	A	missense_variant	PITA_000004589-RA	c.134C>A	p.Ala45Asp	MODERATE	no	AT1G44575	NONE	Encoding PSII-S (CP22), a ubiquitous pigment-binding protein associated with photosystem II (PSII) of higher plants. Involved in nonphotochemical quenching rather than in photosynthesis. Mutant has a normal violaxanthin cycle but has a limited capacity of quenching singlet excited chlorophylls and is tolerant to lipid peroxidation.
tscaffold4847	13941	G	C	missense_variant	PITA_000004589-RA	c.159G>C	p.Leu53Phe	MODERATE	no	AT1G44575	NONE	Encoding PSII-S (CP22), a ubiquitous pigment-binding protein associated with photosystem II (PSII) of higher plants. Involved in nonphotochemical quenching rather than in photosynthesis. Mutant has a normal violaxanthin cycle but has a limited capacity of quenching singlet excited chlorophylls and is tolerant to lipid peroxidation.
tscaffold4847	13958	C	T	missense_variant	PITA_000004589-RA	c.176C>T	p.Ala59Val	MODERATE	no	AT1G44575	NONE	Encoding PSII-S (CP22), a ubiquitous pigment-binding protein associated with photosystem II (PSII) of higher plants. Involved in nonphotochemical quenching rather than in photosynthesis. Mutant has a normal violaxanthin cycle but has a limited capacity of quenching singlet excited chlorophylls and is tolerant to lipid peroxidation.
tscaffold4847	13966	A	G	missense_variant	PITA_000004589-RA	c.184A>G	p.Thr62Ala	MODERATE	no	AT1G44575	NONE	Encoding PSII-S (CP22), a ubiquitous pigment-binding protein associated with photosystem II (PSII) of higher plants. Involved in nonphotochemical quenching rather than in photosynthesis. Mutant has a normal violaxanthin cycle but has a limited capacity of quenching singlet excited chlorophylls and is tolerant to lipid peroxidation.
tscaffold4910	115697	G	T	5_prime_UTR_variant	PITA_000046857-RA	c.-222C>A	NONE	MODIFIER	no	AT1G56110	NONE	NOP56-like protein
tscaffold4948	72833	G	C	synonymous_variant	PITA_000008150-RA	c.645C>G	p.Arg215Arg	LOW	no	AT1G53540	NONE	HSP20-like chaperones superfamily protein;(source:Araport11)
tscaffold4958	279816	A	C	missense_variant	PITA_000022865-RA	c.221T>G	p.Leu74Arg	MODERATE	yes	AT2G05160	NONE	CCCH-type zinc fingerfamily protein with RNA-binding domain-containing protein;(source:Araport11)
tscaffold5000	219114	C	T	intron_variant	PITAhm_002290-RA	c.73+860G>A	NONE	MODIFIER	no	AT5G44635	NONE	minichromosome maintenance (MCM2/3/5) family protein;(source:Araport11)
tscaffold5000	219129	G	A	intron_variant	PITAhm_002290-RA	c.73+845C>T	NONE	MODIFIER	no	AT5G44635	NONE	minichromosome maintenance (MCM2/3/5) family protein;(source:Araport12)
tscaffold5000	219178	C	G	intron_variant	PITAhm_002290-RA	c.73+796G>C	NONE	MODIFIER	no	AT5G44635	NONE	minichromosome maintenance (MCM2/3/5) family protein;(source:Araport13)
tscaffold5000	219181	A	G	intron_variant	PITAhm_002290-RA	c.73+793T>C	NONE	MODIFIER	no	AT5G44635	NONE	minichromosome maintenance (MCM2/3/5) family protein;(source:Araport14)
tscaffold5000	219202	C	T	intron_variant	PITAhm_002290-RA	c.73+772G>A	NONE	MODIFIER	no	AT5G44635	NONE	minichromosome maintenance (MCM2/3/5) family protein;(source:Araport15)
tscaffold5191	41947	C	T	intergenic_region	NONE	n.41947C>T	NONE	MODIFIER	no	NONE	NONE	NONE
tscaffold5281	9175	A	T	missense_variant	PITA_000040482-RA	c.789T>A	p.Asn263Lys	MODERATE	no	AT4G27220	NONE	NB-ARC domain-containing disease resistance protein;(source:Araport11)
tscaffold5379	192822	T	G	downstream_gene_variant	PITAhm_002164-RA	c.*1128A>C	NONE	MODIFIER	yes	AT5G65700	NONE	Encodes a CLAVATA1-related receptor kinase-like protein required for both shoot and flower meristem function. Very similar to BAM2,with more than 85% a.a. identity. It has a broad expression pattern and is involved in vascular strand development in the leaf, control of leaf shape, size and symmetry, male gametophyte development and ovule specification and function. Anthers of double mutants (bam1…
tscaffold5416	420508	G	T	synonymous_variant	PITA_000014810-RA	c.1911G>T	p.Gly637Gly	LOW	no	AT1G34300	NONE	lectin protein kinase family protein;(source:Araport11)
tscaffold5416	420516	G	A	missense_variant	PITA_000014810-RA	c.1919G>A	p.Arg640Lys	MODERATE	no	AT1G34300	NONE	lectin protein kinase family protein;(source:Araport12)
tscaffold5609	427782	T	A	missense_variant	PITA_000014633-RA	c.533T>A	p.Phe178Tyr	MODERATE	no	AT3G21640	NONE	encodes a 42 kDa FK506-binding protein (AtFKBP42) that possesses similarity to multidomain peptidyl-prolyl cis/trans isomerases (PPIases, EC 5.2.1.8), which are known to be components of mammalian steroid hormone receptor complexes. The protein appears to be localized to the plasma membrane by electron microscopy and binds to HSP90.1 and calmodulin in vitro. It also aggregates citrate synthase in…
tscaffold5647	167459	A	G	downstream_gene_variant	PITA_000006739-RA	c.*142T>C	NONE	MODIFIER	no	AT4G01070	NONE	the glycosyltransferase (UGT72B1) is involved in metabolizing xenobiotica (chloroaniline and chlorophenole). Comparison between wild type and knock-out mutant demonstrates the central role of this gene for metabolizing chloroaniline but significantly less for chlorophenole. The glucosyltransferase preferred UDP-xylose over UDP-glucose indicating its (additional) functioning as a xylosyltransferas…
tscaffold5878	576875	T	C	upstream_gene_variant	PITA_000009924-RA	c.-44T>C	NONE	MODIFIER	no	AT5G17630	NONE	Phosphate translocator family member which resides in the plastid inner envelope membrane. Retrieves excessive pentose phosphates from the extra-plastidial space and makes them available to the plastids.
tscaffold5878	577171	A	G	missense_variant	PITA_000009924-RA	c.253A>G	p.Thr85Ala	MODERATE	no	AT5G17630	NONE	Phosphate translocator family member which resides in the plastid inner envelope membrane. Retrieves excessive pentose phosphates from the extra-plastidial space and makes them available to the plastids.
tscaffold5935	325915	C	T	intergenic_region	NONE	n.325915C>T	NONE	MODIFIER	yes	NONE	NONE	NONE
tscaffold5935	325918	C	G	intergenic_region	NONE	n.325918C>G	NONE	MODIFIER	yes	NONE	NONE	NONE
tscaffold5935	325945	C	G	intergenic_region	NONE	n.325945C>G	NONE	MODIFIER	no	NONE	NONE	NONE
tscaffold5935	325955	C	G	intergenic_region	NONE	n.325955C>G	NONE	MODIFIER	no	NONE	NONE	NONE
tscaffold5935	325981	T	C	intergenic_region	NONE	n.325981T>C	NONE	MODIFIER	no	NONE	NONE	NONE
tscaffold5935	326004	C	A	intergenic_region	NONE	n.326004C>A	NONE	MODIFIER	no	NONE	NONE	NONE
tscaffold6065	1217630	C	T	intron_variant	PITAhm_003323-RA	c.963+133625C>T	NONE	MODIFIER	no	NONE	NONE	NONE
tscaffold6065	1245106	C	T	intron_variant	PITAhm_003323-RA	c.963+161101C>T	NONE	MODIFIER	no	NONE	NONE	NONE
tscaffold6065	1384890	C	A	intron_variant	PITAhm_003323-RA	c.964-95396C>A	NONE	MODIFIER	no	NONE	NONE	NONE
tscaffold616	1863708	G	A	missense_variant	PITA_000000122-RA	c.118G>A	p.Ala40Thr	MODERATE	no	AT1G53800	NONE	muscle M-line assembly protein;(source:Araport11)
tscaffold6193	61141	C	T	missense_variant	PITA_000057552-RA	c.560C>T	p.Ala187Val	MODERATE	yes	AT5G16990	NONE	molecular function has not been defined, was shown involved in oxidative stress tolerance. The mRNA is cell-to-cell mobile.
tscaffold6193	61150	T	C	missense_variant	PITA_000057552-RA	c.569T>C	p.Val190Ala	MODERATE	yes	AT5G16990	NONE	molecular function has not been defined, was shown involved in oxidative stress tolerance. The mRNA is cell-to-cell mobile.
tscaffold6295	460427	A	C	5_prime_UTR_variant	PITA_000013072-RA	c.-88A>C	NONE	MODIFIER	no	AT2G41870	NONE	Remorin family protein;(source:Araport11)
tscaffold6295	460449	G	C	5_prime_UTR_variant	PITA_000013072-RA	c.-66G>C	NONE	MODIFIER	yes	AT2G41870	NONE	Remorin family protein;(source:Araport12)
tscaffold6295	460654	G	C	missense_variant	PITA_000013072-RA	c.140G>C	p.Gly47Ala	MODERATE	no	AT2G41870	NONE	Remorin family protein;(source:Araport13)
tscaffold6295	460751	T	G	missense_variant	PITA_000013072-RA	c.237T>G	p.Asp79Glu	MODERATE	no	AT2G41870	NONE	Remorin family protein;(source:Araport14)
tscaffold6317	217133	T	C	intergenic_region	NONE	n.217133T>C	NONE	MODIFIER	no	NONE	NONE	NONE
tscaffold6349	86785	G	A	missense_variant	PITA_000040926-RA	c.1508C>T	p.Ala503Val	MODERATE	no	AT1G25390	NONE	Protein kinase superfamily protein;(source:Araport11)
tscaffold6397	105378	G	T	downstream_gene_variant	PITA_000013185-RA	c.*66G>T	NONE	MODIFIER	no	AT1G69840	NONE	SPFH/Band 7/PHB domain-containing membrane-associated protein family;(source:Araport11)
tscaffold6411	406475	A	G	splice_region_variant&stop_retained_variant	PITAhm_000485-RA	c.1410A>G	p.Ter470Ter	LOW	no	AT5G67320	NONE	Encodes a WD-42 protein involved in histone deacetylation in response to abiotic stress.Identified in a screen for mutations with altered expression of stress induced genes. Functions as a repressor of cold tolerance induced genes. Loss of function mutant _x0000__x0000__x0000__xFFFF__xFFFF__x0000__x0000__x0000__x0000__x0000__x0000__x0000__x0000__x0000__x0000__x0000__x0000__x0000__x0000__x0000__x0…
tscaffold6411	406476	C	T	splice_donor_variant&intron_variant	PITAhm_000485-RA	c.1410+1C>T	NONE	HIGH	yes	AT5G67320	NONE	Encodes a WD-42 protein involved in histone deacetylation in response to abiotic stress.Identified in a screen for mutations with altered expression of stress induced genes. Functions as a repressor of cold tolerance induced genes. Loss of function mutant _x0000__x0000__x0000__xFFFF__xFFFF__x0000__x0000__x0000__x0000__x0000__x0000__x0000__x0000__x0000__x0000__x0000__x0000__x0000__x0000__x0000__x0…
tscaffold6411	406481	G	A	splice_region_variant&intron_variant	PITAhm_000485-RA	c.1410+6G>A	NONE	LOW	yes	AT5G67320	NONE	Encodes a WD-42 protein involved in histone deacetylation in response to abiotic stress.Identified in a screen for mutations with altered expression of stress induced genes. Functions as a repressor of cold tolerance induced genes. Loss of function mutant _x0000__x0000__x0000__xFFFF__xFFFF__x0000__x0000__x0000__x0000__x0000__x0000__x0000__x0000__x0000__x0000__x0000__x0000__x0000__x0000__x0000__x0…
tscaffold6420	323958	T	C	intergenic_region	NONE	NONE	NONE	MODIFIER	no	NONE	NONE	NONE
tscaffold6588	89427	A	C	intergenic_region	NONE	n.89427A>C	NONE	MODIFIER	no	NONE	NONE	NONE
tscaffold6618	18737	C	T	synonymous_variant	PITA_000090155-RA	c.177G>A	p.Glu59Glu	LOW	yes	AT3G25830	NONE	Encodes the monoterpene 1,8-cineole synthase, atTPS-Cin. This polypeptide was also shown to synthesize other monoterpenes albeit in minor quantities. The same polypeptide is encoded at two different loci, the result of gene duplication: at3g25820 and at3g25830.
tscaffold6814	344808	C	T	intron_variant	PITA_000017764-RA	c.164NONE82C>T	NONE	MODIFIER	no	AT5G56670	NONE	Ribosomal protein S30 family protein;(source:Araport11)
tscaffold6814	344891	T	C	intron_variant	PITA_000017764-RA	c.164-99T>C	NONE	MODIFIER	no	AT5G56670	NONE	Ribosomal protein S30 family protein;(source:Araport12)
tscaffold7016	4311	A	T	intergenic_region	NONE	NONE	NONE	MODIFIER	no	NONE	NONE	NONE
tscaffold7026	260471	A	T	intron_variant	PITAhm_001028-RA	c.1301-28409A>T	NONE	MODIFIER	no	AT3G48000	NONE	Encodes a putative (NAD+) aldehyde dehydrogenase.
tscaffold7050	125073	C	T	intergenic_region	NONE	n.125073C>T	NONE	MODIFIER	no	NONE	NONE	NONE
tscaffold7112	117817	T	C	synonymous_variant	PITA_000026318-RA	c.105A>G	p.Pro35Pro	LOW	yes	AT2G27680	NONE	NAD(P)-linked oxidoreductase superfamily protein;(source:Araport11)
tscaffold7238	86824	C	T	intergenic_region	NONE	NONE	NONE	MODIFIER	no	NONE	NONE	NONE
tscaffold7267	314121	G	C	missense_variant&splice_region_variant	PITA_000013143-RA	c.428C>G	p.Ala143Gly	MODERATE	no	AT3G09890	NONE	Ankyrin repeat family protein;(source:Araport11)
tscaffold7288	91208	A	G	missense_variant	PITA_000014100-RA	c.1219A>G	p.Thr407Ala	MODERATE	yes	AT3G21670	NONE	Major facilitator superfamily protein;(source:Araport11)
tscaffold7290	399592	T	G	upstream_gene_variant	PITAhm_002716-RA	c.NONE91A>C	NONE	MODIFIER	no	AT4G17910	NONE	transferases, transferring acyl groups;(source:Araport11)
tscaffold7457	222470	G	A	synonymous_variant	1A_I11_VO_L_1_T_159276/226447|m.5261.mrna1	c.5760C>T	p.Thr1920Thr	LOW	no	AT1G01790	NONE	transferases, transferring acyl groups;(source:Araport12)
tscaffold7533	627115	T	C	synonymous_variant	PITA_000007849-RA	c.1050T>C	p.Ser350Ser	LOW	no	AT3G05390	NONE	S-adenosyl-L-methionine-dependent methyltransferase;(source:Araport11)
tscaffold7553	225313	A	G	intergenic_region	NONE	n.225313A>G	NONE	MODIFIER	no	NONE	NONE	NONE
tscaffold7725	2142845	A	G	synonymous_variant	PITA_000000859-RA	c.690A>G	p.Lys230Lys	LOW	no	AT1G32780	NONE	GroES-like zinc-binding dehydrogenase family protein;(source:Araport11)
tscaffold7951	95735	C	T	intron_variant	PITAhm_002069-RA	c.648+1124C>T	NONE	MODIFIER	no	AT3G59030	NONE	Encodes a proton antiporter. Involved in the transportation of proanthocyanidin precursors into the vacuole. In vitro transport experiments showed that cyanidin-3-O-glucoside (anthocyanin) was an effective substrate, whereas the proanthocyanidin precursor epicatechin was not transported. However catechin-3-O-glucoside inhibited anthocyanin transport in a dose-dependent manner suggesting that glyc…
tscaffold8282	16626	T	C	synonymous_variant	PITAhm_001882-RA	c.1119T>C	p.Asp373Asp	LOW	no	AT5G06390	NONE	Encodes a proton antiporter. Involved in the transportation of proanthocyanidin precursors into the vacuole. In vitro transport experiments showed that cyanidin-3-O-glucoside (anthocyanin) was an effective substrate, whereas the proanthocyanidin precursor epicatechin was not transported. However catechin-3-O-glucoside inhibited anthocyanin transport in a dose-dependent manner suggesting that glyc…
tscaffold8282	16680	T	C	synonymous_variant	PITAhm_001882-RA	c.1173T>C	p.Asp391Asp	LOW	no	AT5G06390	NONE	Encodes a proton antiporter. Involved in the transportation of proanthocyanidin precursors into the vacuole. In vitro transport experiments showed that cyanidin-3-O-glucoside (anthocyanin) was an effective substrate, whereas the proanthocyanidin precursor epicatechin was not transported. However catechin-3-O-glucoside inhibited anthocyanin transport in a dose-dependent manner suggesting that glyc…
tscaffold8282	16698	G	A	synonymous_variant	PITAhm_001882-RA	c.1191G>A	p.Arg397Arg	LOW	no	AT5G06390	NONE	Encodes a proton antiporter. Involved in the transportation of proanthocyanidin precursors into the vacuole. In vitro transport experiments showed that cyanidin-3-O-glucoside (anthocyanin) was an effective substrate, whereas the proanthocyanidin precursor epicatechin was not transported. However catechin-3-O-glucoside inhibited anthocyanin transport in a dose-dependent manner suggesting that glyc…
tscaffold8282	16731	T	C	synonymous_variant	PITAhm_001882-RA	c.1224T>C	p.Phe408Phe	LOW	no	AT5G06390	NONE	Encodes a proton antiporter. Involved in the transportation of proanthocyanidin precursors into the vacuole. In vitro transport experiments showed that cyanidin-3-O-glucoside (anthocyanin) was an effective substrate, whereas the proanthocyanidin precursor epicatechin was not transported. However catechin-3-O-glucoside inhibited anthocyanin transport in a dose-dependent manner suggesting that glyc…
tscaffold8328	179648	C	A	missense_variant	PITA_000029018-RA	c.286G>T	p.Val96Phe	MODERATE	no	AT3G56460	NONE	GroES-like zinc-binding alcohol dehydrogenase family protein;(source:Araport11)
tscaffold8333	29733	A	G	intergenic_region	NONE	NONE	NONE	MODIFIER	no	NONE	NONE	NONE
tscaffold8403	570678	C	T	missense_variant	PITA_000009568-RA	c.52C>T	p.Arg18Cys	MODERATE	yes	AT4G03020	NONE	transducin family protein / WD-40 repeat family protein;(source:Araport11)
tscaffold8421	350091	C	T	synonymous_variant	PITA_000015991-RA	c.772C>T	p.Leu258Leu	LOW	no	AT1G12820	NONE	Auxin receptor involved in primary and lateral root growth inhibition in response to nitrate. Target of miR393. Induced by nitrate in primary roots.
tscaffold8551	75504	C	T	missense_variant	PITA_000042245-RA	c.523G>A	p.Gly175Arg	MODERATE	yes	AT5G07990	NONE	Required for flavonoid 3' hydroxylase activity. Enzyme abundance relative to CHS determines Quercetin/Kaempferol metabolite ratio. The mRNA is cell-to-cell mobile.
tscaffold8551	75533	G	A	missense_variant	PITA_000042245-RA	c.494C>T	p.Ala165Val	MODERATE	no	AT5G07990	NONE	Required for flavonoid 4' hydroxylase activity. Enzyme abundance relative to CHS determines Quercetin/Kaempferol metabolite ratio. The mRNA is cell-to-cell mobile.
tscaffold8551	75556	A	G	synonymous_variant	PITA_000042245-RA	c.471T>C	p.Asn157Asn	LOW	no	AT5G07990	NONE	Required for flavonoid 5' hydroxylase activity. Enzyme abundance relative to CHS determines Quercetin/Kaempferol metabolite ratio. The mRNA is cell-to-cell mobile.
tscaffold8575	69316	A	G	synonymous_variant	PITAhm_001023-RA	c.1308T>C	p.Tyr436Tyr	LOW	no	AT1G60710	NONE	Encodes ATB2.
tscaffold8575	69930	C	T	synonymous_variant	PITAhm_001023-RA	c.975G>A	p.Arg325Arg	LOW	no	AT1G60710	NONE	Encodes ATB3.
tscaffold8575	69936	A	G	synonymous_variant	PITAhm_001023-RA	c.969T>C	p.Leu323Leu	LOW	no	AT1G60710	NONE	Encodes ATB4.
tscaffold8767	66735	T	C	non_coding_transcript_variant	PITAhm_002141-RA	c.3404A>G	NONE	MODIFIER	no	AT3G45630	NONE	RNA binding (RRM/RBD/RNP motifs) family protein;(source:Araport11)
tscaffold897	174337	A	G	intergenic_region	NONE	NONE	NONE	MODIFIER	yes	NONE	NONE	NONE
tscaffold9021	153503	T	A	missense_variant	PITA_000006768-RA	c.1277A>T	p.Asp426Val	MODERATE	no	AT3G13930	NONE	Encodes a subunit of the mitochondrial pyruvate dehydrogenase complex.
tscaffold9021	689620	C	T	upstream_gene_variant	PITA_000006770-RA	c.-267G>A	NONE	MODIFIER	no	AT1G49820	NONE	encodes 5-methylthioribose kinase, involved in methionine cycle The mRNA is cell-to-cell mobile.
tscaffold9134	266389	G	A	synonymous_variant	PITA_000006988-RA	c.693G>A	p.Gln231Gln	LOW	no	AT2G19810	C3H	Encodes Oxidation-related Zinc Finger 1 (OZF1), a plasma membrane protein involved in oxidative stress.
